# Supplementary material for: Tissue-print and print-phoresis as platform technologies for the molecular analysis of human surgical specimens: mapping tumor invasion of the prostate capsule
Source: Springer Nature journal article supplement (doi:10.1038/nm1169), 2004-12-26
Supplement: nm1169-S4.pdf [file nm1169-S4.pdf]

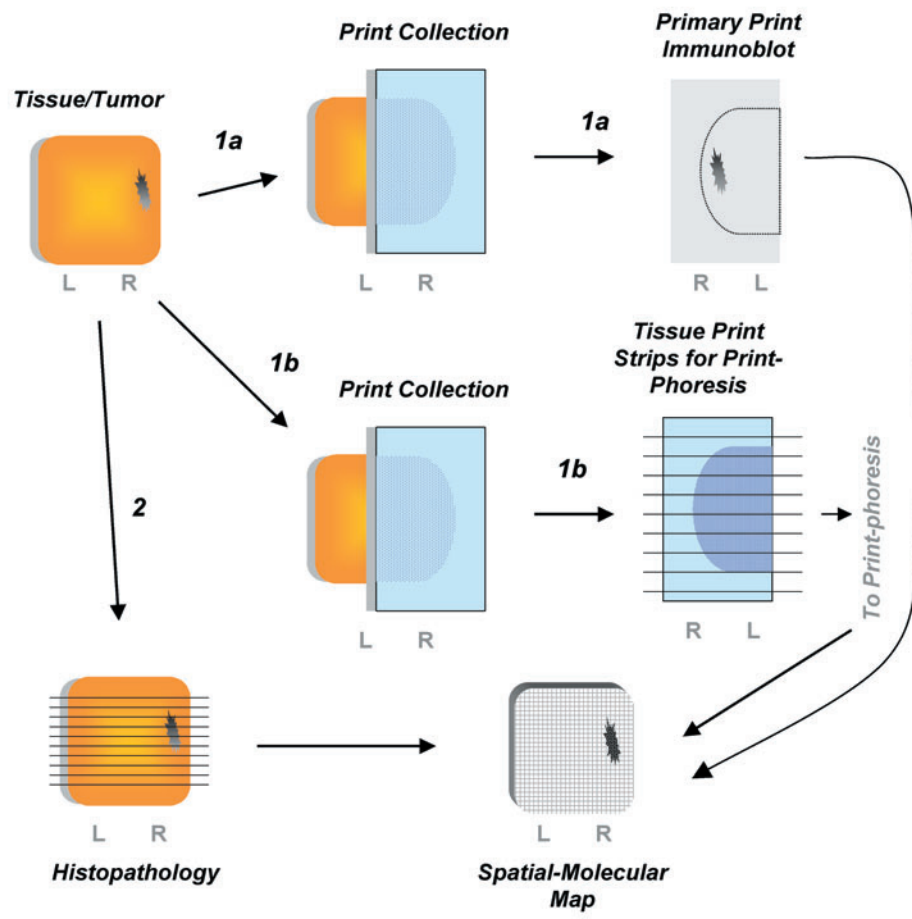

**Supplemental Figure 4: Flow Chart of Spatial-Molecular Profiling of Tumor Associated Proteins with Tissue Print and Print-Phoresis Technologies.** Duplicate tissue print collection allows for analysis of both the primary print and of print-phoresis profiles from the same specimen. Focal concentrations of specific markers are visualized directly on the primary prints; more complex molecular expression patterns are obtained from print-phoresis gels and western blots. Print collection is documented photographically, and fiduciary markers (marker inks) are applied to aid later orientation and alignment. Marker maps derived from analysis of the primary prints and the print phoresis profiles are correlated with the histopathological features of specimen, which are undamaged by the tissue printing process.
